# Supplementary material for: Conjugated organic framework with three-dimensionally ordered stable structure and delocalized π clouds
Source: PubMed Central journal article supplement — Nat Commun. 2013 Nov 13;4:2736. doi: 10.1038/ncomms3736 (PMC3868157; doi:10.1038/ncomms3736), 2013-11-13
Supplement: ncomms3736-s1.pdf [file ncomms3736-s1.pdf]

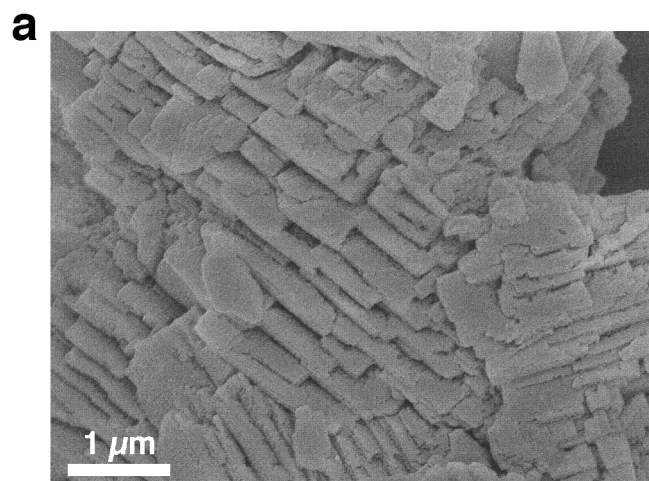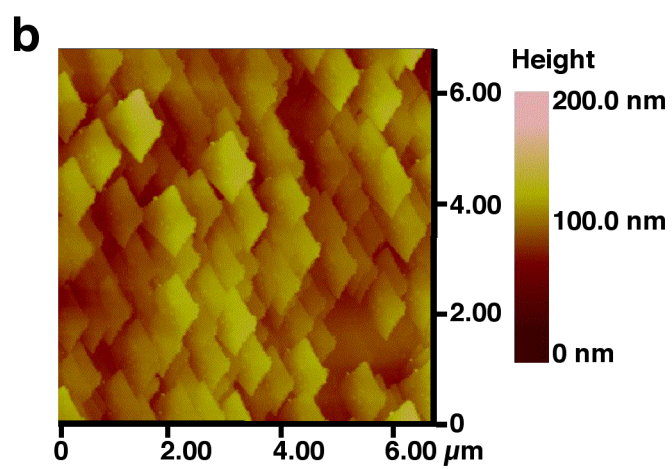

**Supplementary Figure S1 | FE-SEM and AFM Images of CS-COF. a, FE SEM image. b, AFM image.**

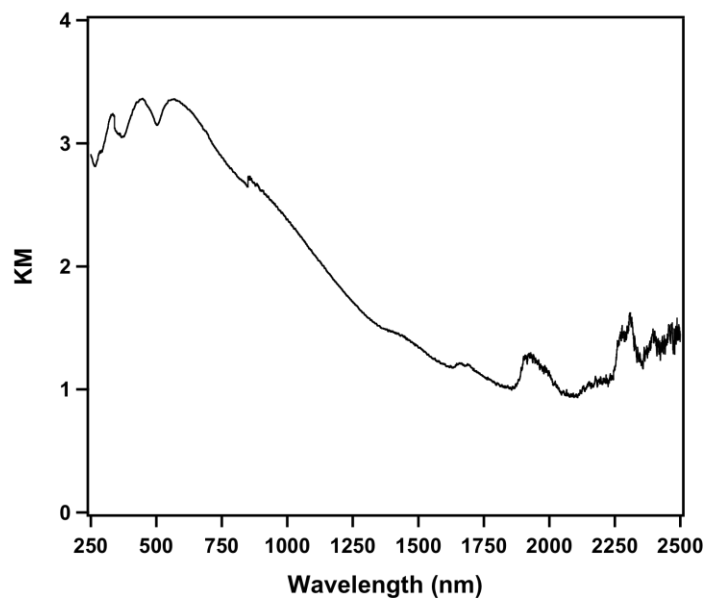

**Suppelementary Figure S2 | Electronic absorption spectrum of CS-COF.** CS-COF displayed broad absorption profile covering from UV to IR regions.

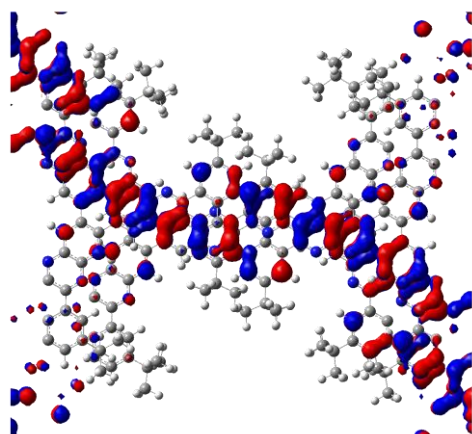

HOMO

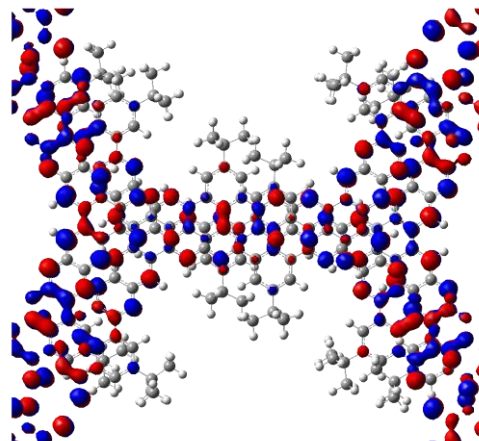

LUMO

**Supplementary Figure S3 | Frontier molecular orbitals (MOs).** The  $\pi$  clouds are delocalized in the 2D skeleton. The 0.8-Å slipped AA stacking unit was shown for both HOMO and LUMO.

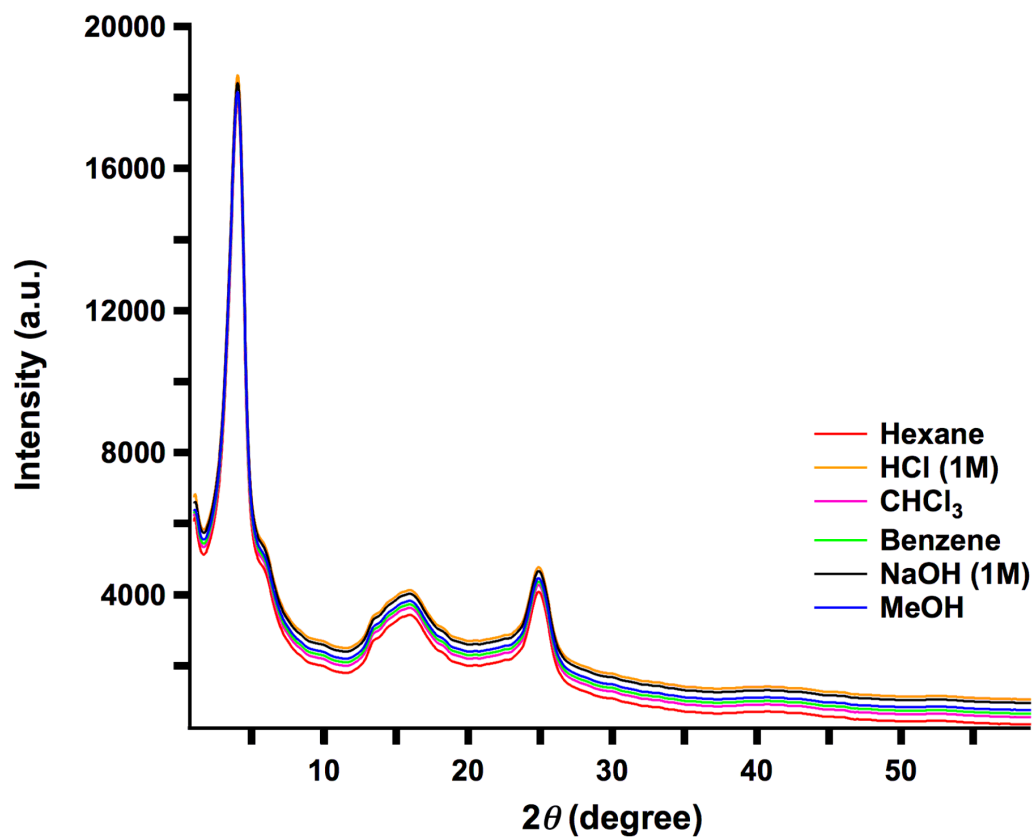

**Supplementary Figure S4 | Chemical stability in different solvents.** XRD patterns of the CS-COF samples, upon keeping in the solvent for 24 h at 25 °C.

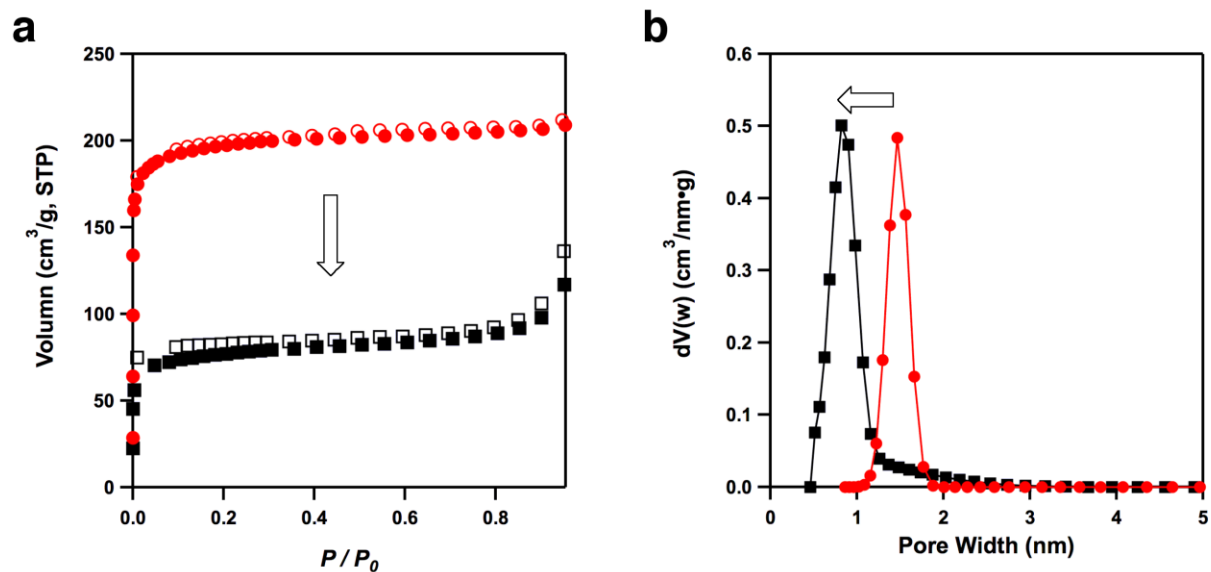

**Supplementary Figure S5 | Nitrogen sorption isotherm profiles.** **a**, Nitrogen adsorption (filled black square) and desorption (open black square) isotherm profiles of CS-COF $\supset$ C60 (black) at 77 K, in comparison with CS-COF (red). **b**, Pore size of CS-COF $\supset$ C60 (black) calculated using the NLDFT analysis method from the N<sub>2</sub> adsorption isotherm, in comparison with CS-COF (red). Upon loading C60, CS-COF showed significant decreases in specific surface area (776  $\rightarrow$  291 m<sup>2</sup> g<sup>-1</sup>), pore volume (0.34  $\rightarrow$  0.2 cm<sup>3</sup> g<sup>-1</sup>), and pore size.

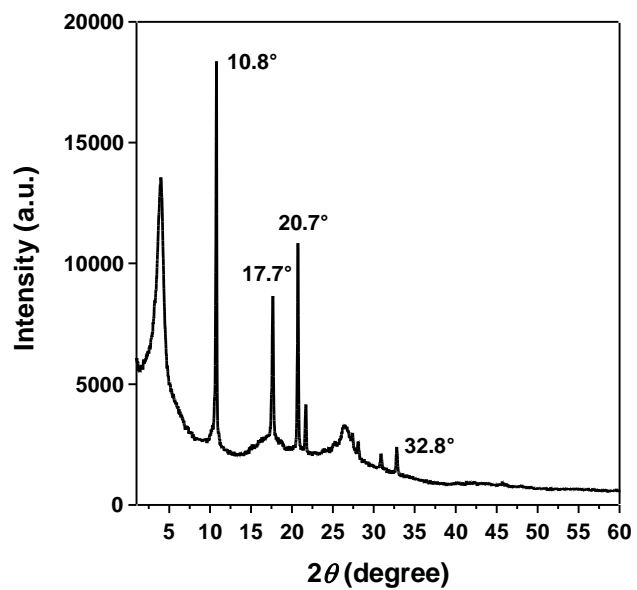

**Supplementary Figure S6 | XRD pattern of CS-COF@C<sub>60</sub>.** The peaks with values are owing to C<sub>60</sub>, while other peaks are due to CS-COF. Small amount of C<sub>60</sub> aggregates existed between CS-COF particles may also contribute to the XRD peaks.

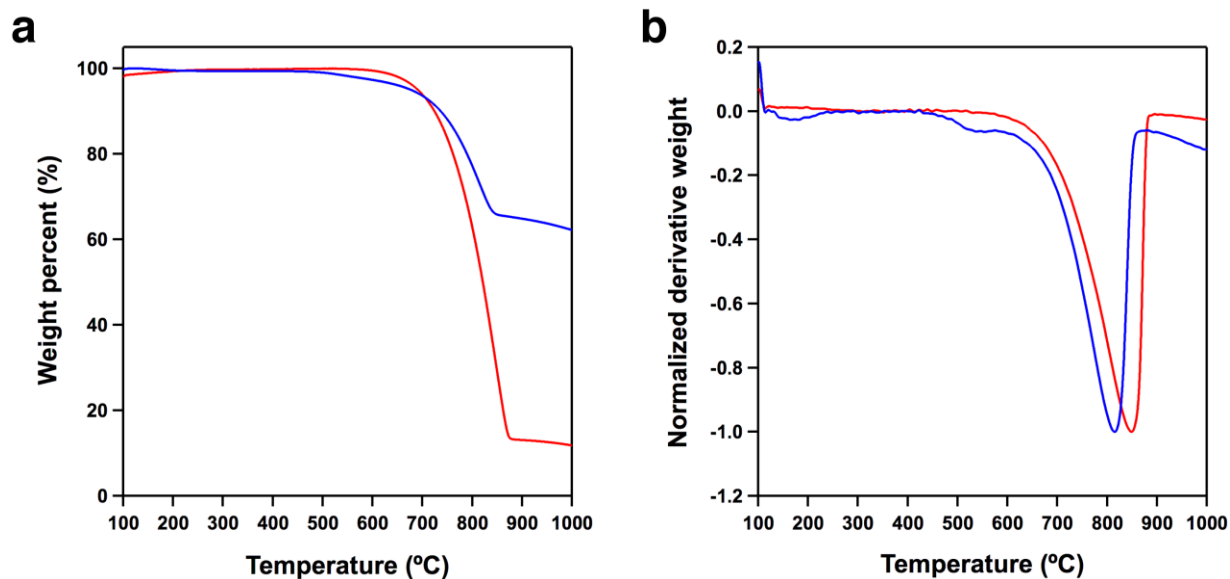

**Supplementary Figure S7 | TGA and DTA profiles.** **a**, TGA profile of CS-COF@C<sub>60</sub> (blue curve) showed a decrease in weight due to the loss of C<sub>60</sub>, which is in the similar temperature region to that of C<sub>60</sub> (red curve). From the comparison of the two curves, the weight content of C<sub>60</sub> in CS-COF@C<sub>60</sub> was calculated to be 25 wt%. **b**, DTA curve of CS-COF@C<sub>60</sub> (blue curve) showed that the loss of C<sub>60</sub> from CS-COF@C<sub>60</sub> takes place at 810 °C. The red curve is the DTA profile of C<sub>60</sub>.

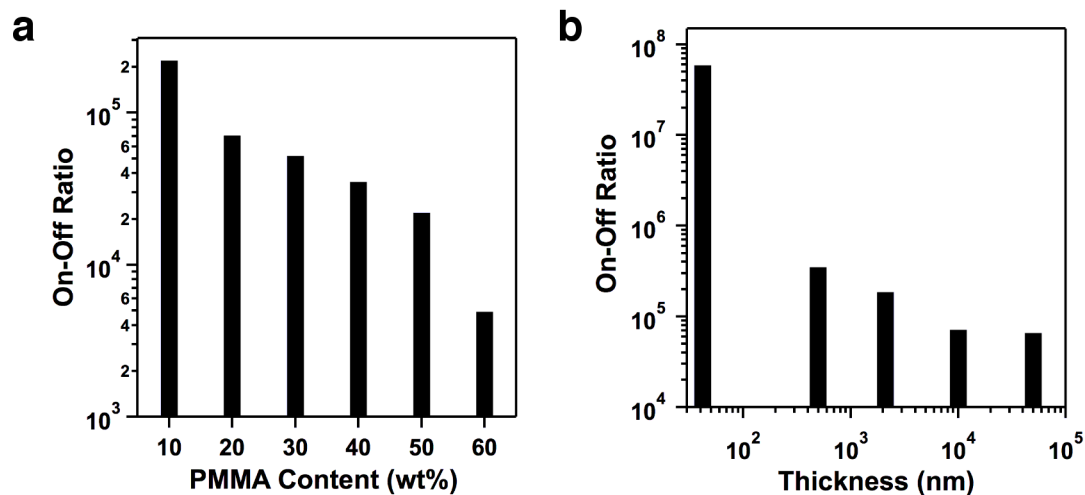

**Supplementary Figure S8 | Performance of on-off photoswitches. a**, Effect of the PMMA content of CS-COF $\rhd$ C60 film (thickness = 100  $\mu$ m) on the photocurrent on-off ratio. **b**, Effect of the thickness of the CS-COF $\rhd$ C60 film (PMMA content = 50 wt%) on the photocurrent on-off ratio.



**Supplementary Table S1** | The total DFTB energies, LJ, and the crystal stacking energies per monolayer as well as the corresponding energy gap for CS-COF.

| Stacking           | $c$<br>[Å] | Total DFTB<br>Energy<br>[a.u.] | LJ energy<br>[a.u.] | Total crystal<br>stacking<br>energy<br>[kcal mol <sup>-1</sup> ] | HOMO-LU<br>MO gap<br>[eV] |
|--------------------|------------|--------------------------------|---------------------|------------------------------------------------------------------|---------------------------|
| Monolayer          |            | -243.027702                    | 1.1731              |                                                                  | 2.046                     |
| AA                 | 6.07       | -486.147851                    | 2.2503              | 29.01                                                            | 2.050                     |
| Slipped AA (0.8 Å) | 4.01       | -486.406628                    | 1.9768              | 110.20                                                           | 2.013                     |
| AB                 | 4.49       | -486.291736                    | 2.1057              | 74.15                                                            | 1.977                     |

**Suppelementary Table S2** | Atomistic coordinates and net charges for the 0.8-Å slipped AA stacking structure.

| atom | x           | y           | z          | population |
|------|-------------|-------------|------------|------------|
| H    | -2.26072953 | 4.60735469  | 4.17854197 | 0.9122687  |
| H    | 4.46614391  | 4.54094576  | 4.17974516 | 0.91319645 |
| H    | 4.42140739  | 0.18259102  | 4.09171623 | 0.9134171  |
| H    | -2.31222895 | 0.24661488  | 4.14964901 | 0.90963096 |
| H    | -1.49092432 | -3.57807145 | 4.19959604 | 0.90799854 |
| H    | 3.51558444  | -3.63445859 | 4.27276397 | 0.91299108 |
| H    | -1.40220622 | 8.37561207  | 4.34461959 | 0.90747193 |
| H    | 3.60340717  | 8.39288914  | 4.37520873 | 0.90726421 |
| H    | -2.45219629 | -5.21779861 | 4.43230721 | 0.90798127 |
| H    | 0.03677724  | -9.54330152 | 4.02761189 | 0.90692375 |
| H    | 4.42183807  | -5.28756186 | 4.65370267 | 0.91138829 |
| H    | 1.87005292  | -9.57030663 | 4.1865389  | 0.90596618 |
| H    | -2.3422249  | 9.99423884  | 4.28676009 | 0.90670395 |
| H    | 0.11690421  | 14.30403276 | 4.94149312 | 0.91146701 |
| H    | 4.52992152  | 10.04136906 | 4.25753754 | 0.90792347 |
| H    | 2.0133882   | 14.32968688 | 4.82125479 | 0.91323713 |
| H    | 8.25830917  | 11.23465776 | 4.07764722 | 0.90904984 |
| H    | 12.00492877 | 13.45945976 | 3.89984499 | 0.91114568 |
| H    | -6.17372919 | -6.41600626 | 4.44039499 | 0.91250839 |
| H    | -9.93474838 | -8.60140616 | 4.50894276 | 0.91158402 |
| H    | -6.1214765  | 11.15902838 | 4.11700589 | 0.90977986 |
| H    | -9.87856982 | 13.36302336 | 4.09756457 | 0.90853632 |
| H    | 8.08627355  | -6.51448048 | 4.5944103  | 0.90911573 |
| H    | 11.85875236 | -8.69635486 | 4.68964753 | 0.91346704 |
| H    | 6.55592268  | 0.37201326  | 4.92854617 | 0.93351878 |
| H    | 6.50309296  | 0.41257481  | 3.14912801 | 0.93371103 |
| H    | 7.9167471   | 1.02282427  | 4.01420375 | 0.93761137 |
| H    | 6.34202746  | 4.20371916  | 2.83346363 | 0.93260486 |
| H    | 7.7649435   | 3.15837219  | 2.7428746  | 0.9376714  |
| H    | 6.2672325   | 2.68925885  | 1.91397561 | 0.93327209 |

|   |              |             |            |            |
|---|--------------|-------------|------------|------------|
| H | 7.83920765   | 3.11961841  | 5.37272909 | 0.93742556 |
| H | 6.40701634   | 4.15595414  | 5.40797025 | 0.93319912 |
| H | 6.39886378   | 2.60951495  | 6.27278915 | 0.93332067 |
| H | -4.45181058  | 0.53112686  | 3.27154955 | 0.93307815 |
| H | -4.38857618  | 0.51104526  | 5.05157529 | 0.93080021 |
| H | -5.79397314  | 1.18402468  | 4.21772983 | 0.93992536 |
| H | -4.16064073  | 4.30761189  | 5.44824084 | 0.9340754  |
| H | -5.59315696  | 3.27365651  | 5.5385753  | 0.93975189 |
| H | -4.09108064  | 2.78505582  | 6.35046649 | 0.92779602 |
| H | -5.62805066  | 3.28939783  | 2.86137841 | 0.93920668 |
| H | -4.17500845  | 4.29752966  | 2.88317187 | 0.93254219 |
| H | -4.17009667  | 2.76417722  | 1.99276352 | 0.93052493 |
| H | -9.39611778  | 11.7382855  | 1.79029868 | 0.93306369 |
| H | -7.86449175  | 10.82804143 | 1.75474033 | 0.93140689 |
| H | -9.41941871  | 9.95672786  | 1.7588134  | 0.93144979 |
| H | -7.89015967  | 9.47904494  | 5.15711802 | 0.92361163 |
| H | -8.76467448  | 8.6227865   | 3.88271482 | 0.9393723  |
| H | -7.20165067  | 9.35608016  | 3.53405385 | 0.93542722 |
| H | -10.78681085 | 9.7869975   | 3.91919589 | 0.93936701 |
| H | -10.43093    | 10.917771   | 5.22521259 | 0.92227279 |
| H | -10.94886747 | 11.52178643 | 3.6471814  | 0.93423656 |
| H | 9.66326463   | 9.54335804  | 4.87977719 | 0.929429   |
| H | 9.44214986   | 9.54825051  | 3.1129732  | 0.93289623 |
| H | 10.80629759  | 8.69177222  | 3.83503731 | 0.94117346 |
| H | 12.43021085  | 11.72510231 | 2.29544738 | 0.93224787 |
| H | 12.35203536  | 9.95555876  | 2.27835517 | 0.94046568 |
| H | 11.00971776  | 10.91152797 | 1.62398032 | 0.92601237 |
| H | 12.6334709   | 9.8358804   | 4.97143331 | 0.940771   |
| H | 12.94762272  | 11.56018782 | 4.74854276 | 0.93549786 |
| H | 11.71693202  | 11.04215185 | 5.91100925 | 0.92101065 |
| H | 12.44090708  | -6.95362384 | 3.22068113 | 0.93354438 |
| H | 11.07060218  | -6.22988969 | 2.35832589 | 0.93244897 |
| H | 12.29600906  | -5.19289891 | 3.11597148 | 0.93655943 |

|   |              |              |             |            |
|---|--------------|--------------|-------------|------------|
| H | 9.35265453   | -4.76836518  | 5.41298783  | 0.93354742 |
| H | 10.56776402  | -3.93568391  | 4.43864848  | 0.93728726 |
| H | 9.29846422   | -4.86175763  | 3.63487921  | 0.93319728 |
| H | 12.38086539  | -5.0288736   | 5.75027429  | 0.93688409 |
| H | 11.24477687  | -6.00062372  | 6.70786991  | 0.93268497 |
| H | 12.56032772  | -6.78789199  | 5.81616143  | 0.93386333 |
| H | -8.75414492  | -5.64104561  | 6.59338865  | 0.93305391 |
| H | -7.41657368  | -4.91120051  | 5.68447747  | 0.93345483 |
| H | -9.01231795  | -4.14967282  | 5.66578167  | 0.93751985 |
| H | -8.7215941   | -5.83949254  | 2.2390938   | 0.93256623 |
| H | -9.02249711  | -4.27297239  | 3.01911706  | 0.93767575 |
| H | -7.4135683   | -5.0014175   | 3.09641573  | 0.93306417 |
| H | -10.91673506 | -5.11510482  | 4.36648624  | 0.93735076 |
| H | -10.80359088 | -6.67728061  | 3.55536764  | 0.93384304 |
| H | -10.82156953 | -6.58603864  | 5.33149503  | 0.93362146 |
| H | -3.67351227  | 1.14530453   | -0.10285151 | 0.91340778 |
| H | 3.0598639    | 1.08635544   | -0.16905363 | 0.90958074 |
| H | 3.01314011   | -3.27453847  | -0.15044679 | 0.91219713 |
| H | -3.71412521  | -3.2135702   | -0.16354055 | 0.91320312 |
| H | -2.84834524  | -7.05952835  | -0.27138055 | 0.90705854 |
| H | 2.15743555   | -7.04342903  | -0.2193385  | 0.90740725 |
| H | -2.76617967  | 4.96728863   | -0.23114709 | 0.91300843 |
| H | 2.24091764   | 4.89640071   | -0.17131621 | 0.9076866  |
| H | -3.77075793  | -8.69484719  | -0.08319663 | 0.9078009  |
| H | -1.27494056  | -12.99314251 | -0.6619685  | 0.91282813 |
| H | 3.09899504   | -8.65915306  | -0.18907857 | 0.90668898 |
| H | 0.63443642   | -12.96995157 | -0.81605513 | 0.91141037 |
| H | -3.66122386  | 6.62783245   | -0.63091266 | 0.9114237  |
| H | -1.10278116  | 10.89724355  | -0.08305699 | 0.90634853 |
| H | 3.20221787   | 6.52325031   | -0.37917948 | 0.90769446 |
| H | 0.74151346   | 10.8531986   | 0.14202357  | 0.90710215 |
| H | 6.98848628   | 7.73405022   | -0.4141573  | 0.91293124 |
| H | 10.71246678  | 9.98377959   | -0.55494922 | 0.91165206 |

|   |              |              |             |            |
|---|--------------|--------------|-------------|------------|
| H | -7.59772261  | -9.89471748  | 0.06343654  | 0.91205594 |
| H | -11.27604762 | -12.2315506  | 0.19915973  | 0.9076601  |
| H | -7.33042641  | 7.85733825   | -0.60281357 | 0.91180691 |
| H | -11.09571643 | 10.05235886  | -0.68214402 | 0.91090072 |
| H | 6.89029403   | -9.8124778   | -0.12133101 | 0.90985316 |
| H | 10.64519466  | -12.01974607 | -0.09582989 | 0.90853734 |
| H | 4.91355634   | -1.42530686  | 2.01382926  | 0.93050393 |
| H | 4.92845395   | -2.96016297  | 1.12623544  | 0.93248386 |
| H | 6.37710028   | -1.94603332  | 1.15200518  | 0.93921201 |
| H | 4.84923537   | -1.45465674  | -2.3439213  | 0.92790604 |
| H | 6.34816615   | -1.94272872  | -1.52593776 | 0.93968066 |
| H | 4.91441369   | -2.97537696  | -1.43811169 | 0.93407872 |
| H | 6.54340628   | 0.15301521   | -0.20843761 | 0.93990808 |
| H | 5.14073138   | 0.82146938   | -1.05045565 | 0.93082499 |
| H | 5.19601012   | 0.80674293   | 0.72986497  | 0.9330378  |
| H | -5.65527609  | -1.28324323  | -2.26948047 | 0.93334166 |
| H | -5.65826962  | -2.82958632  | -1.40424047 | 0.93322286 |
| H | -7.09214569  | -1.79553487  | -1.36513065 | 0.9374402  |
| H | -5.51102282  | -1.36131714  | 2.08895985  | 0.93324789 |
| H | -7.01238695  | -1.828524    | 1.26556619  | 0.93769695 |
| H | -5.5916007   | -2.87616564  | 1.17064566  | 0.93265567 |
| H | -7.16727793  | 0.30401799   | -0.00706907 | 0.93761876 |
| H | -5.75041977  | 0.91560274   | 0.85187614  | 0.93369997 |
| H | -5.80997557  | 0.95381008   | -0.92737987 | 0.93354989 |
| H | -9.95043786  | 6.97862636   | -2.66906556 | 0.932916   |
| H | -8.59039119  | 6.30553277   | -1.75104448 | 0.93366096 |
| H | -10.18046256 | 5.53626705   | -1.66031791 | 0.93688253 |
| H | -9.8378734   | 7.39595131   | 1.66902287  | 0.93230545 |
| H | -10.15703443 | 5.79355717   | 0.97318859  | 0.93684849 |
| H | -8.54849929  | 6.51475332   | 0.82951789  | 0.93325115 |
| H | -12.08047275 | 6.5865843    | -0.41590924 | 0.93704449 |
| H | -11.9390064  | 8.17235166   | 0.34792205  | 0.93328763 |
| H | -11.97079924 | 8.03038838   | -1.42802945 | 0.93361377 |

|   |              |              |             |            |
|---|--------------|--------------|-------------|------------|
| H | 9.81340886   | 7.1789579    | 1.64543739  | 0.93285157 |
| H | 8.4174344    | 6.34412969   | 0.93665406  | 0.93342898 |
| H | 10.03006417  | 5.62709761   | 0.80954253  | 0.9373896  |
| H | 9.32859259   | 7.02503008   | -2.68534717 | 0.93241375 |
| H | 9.75991094   | 5.54017808   | -1.81565751 | 0.93747998 |
| H | 8.14416744   | 6.23107897   | -1.63120571 | 0.93362507 |
| H | 11.76188423  | 6.55976959   | -0.76162069 | 0.93750278 |
| H | 11.49488531  | 8.06318243   | -1.64842163 | 0.93273584 |
| H | 11.69467905  | 8.0869086    | 0.12162859  | 0.93386644 |
| H | 8.65181697   | -8.14089801  | -1.15975077 | 0.92366207 |
| H | 7.97724289   | -8.00126971  | 0.4675123   | 0.93532362 |
| H | 9.54187853   | -7.27894735  | 0.09943975  | 0.93937646 |
| H | 10.15668826  | -10.39792671 | 2.20843826  | 0.93329538 |
| H | 10.15766379  | -8.61666145  | 2.2495184   | 0.93108672 |
| H | 8.61411807   | -9.50658354  | 2.23509757  | 0.93135121 |
| H | 11.56359279  | -8.45261606  | 0.13866026  | 0.93980394 |
| H | 11.70957361  | -10.19905725 | 0.33241499  | 0.93405922 |
| H | 11.20678645  | -9.51819826  | -1.21985494 | 0.92229065 |
| H | -10.36871523 | -9.87702061  | 2.53158622  | 0.92315117 |
| H | -9.04114806  | -8.85002006  | 1.92042192  | 0.9304191  |
| H | -10.68905519 | -8.20206543  | 2.02838883  | 0.94092922 |
| H | -10.3392755  | -8.76537342  | -1.63331323 | 0.92663797 |
| H | -10.50654833 | -7.5395471   | -0.36732058 | 0.94165397 |
| H | -8.93222213  | -8.28988559  | -0.65395254 | 0.93137687 |
| H | -12.4646021  | -8.90869171  | 0.33235328  | 0.93948591 |
| H | -12.17291133 | -10.279868   | -0.74517428 | 0.93261935 |
| H | -12.29401596 | -10.52317257 | 1.01679555  | 0.93277793 |
| C | 4.66124324   | 2.35997072   | 4.12860284  | 3.993732   |
| C | 3.94276623   | 3.57118554   | 4.16605327  | 4.09356803 |
| C | 2.53708781   | 3.60406859   | 4.17802109  | 4.00771259 |
| C | 1.80219864   | 2.3858348    | 4.16158755  | 4.00313815 |
| C | 2.51507381   | 1.15728191   | 4.1439241   | 4.00723276 |
| C | 3.92342429   | 1.1632579    | 4.12015252  | 4.09648899 |

|   |             |             |            |            |
|---|-------------|-------------|------------|------------|
| C | 1.82243091  | 4.88224614  | 4.20739931 | 3.85641772 |
| C | 0.35371297  | 2.39644368  | 4.16079501 | 4.00745872 |
| C | -0.35748082 | 3.62522919  | 4.16876777 | 4.00843271 |
| C | -1.76195934 | 3.62495789  | 4.16682005 | 4.08874555 |
| C | -2.50512017 | 2.4300249   | 4.15931464 | 3.98436893 |
| C | -1.79433725 | 1.21750574  | 4.15140807 | 4.09120735 |
| C | -0.38591893 | 1.18404331  | 4.15238108 | 4.01104418 |
| C | 1.77553776  | -0.10656938 | 4.15848894 | 3.85387109 |
| C | 0.32849773  | -0.09237253 | 4.1609742  | 3.85630754 |
| C | 0.30940503  | -2.39648916 | 4.21034343 | 3.85354049 |
| C | 1.74404435  | -2.41125407 | 4.22029609 | 3.85118806 |
| C | -0.3931473  | -3.62985322 | 4.23140471 | 4.13564077 |
| C | 2.41606505  | -3.66047548 | 4.27326296 | 4.13529394 |
| C | 1.71904527  | -4.87235089 | 4.31829137 | 3.978439   |
| C | 0.37697544  | 4.88815495  | 4.19639282 | 3.85485659 |
| C | 0.38705559  | 7.1879305   | 4.27075145 | 3.85277874 |
| C | 1.82130674  | 7.18704016  | 4.28266095 | 3.85272702 |
| C | -0.30430985 | 8.42366997  | 4.33262166 | 4.13511504 |
| C | 2.50501385  | 8.42969165  | 4.34938554 | 4.1342327  |
| C | 1.81892264  | 9.64767665  | 4.40689693 | 3.98228361 |
| C | 0.27427232  | -4.85729537 | 4.28309589 | 3.97937565 |
| C | -0.47402521 | -6.12495972 | 4.27540256 | 3.98121945 |
| C | -1.87137848 | -6.14581246 | 4.33242237 | 4.13344989 |
| C | 0.24109006  | -7.37593983 | 4.19660478 | 3.98182624 |
| C | 2.43840081  | -6.15551364 | 4.3780224  | 3.98029694 |
| C | -2.60040123 | -7.3638601  | 4.28850882 | 3.8539121  |
| C | -0.47192187 | -8.57336328 | 4.10762927 | 4.13590503 |
| C | 1.70675858  | -7.39439071 | 4.26466362 | 3.98172682 |
| C | 3.8270562   | -6.2050109  | 4.53306472 | 4.14029407 |
| C | -1.88616365 | -8.59998578 | 4.15285002 | 3.85294694 |
| C | 2.39682035  | -8.60975378 | 4.26852362 | 4.1367185  |
| C | 4.53388934  | -7.43688801 | 4.52760804 | 3.85541606 |
| C | 3.80767496  | -8.66577258 | 4.38251713 | 3.85311858 |

|   |             |             |            |            |
|---|-------------|-------------|------------|------------|
| C | 0.37436298  | 9.64314145  | 4.4030986  | 3.98257651 |
| C | -0.3702091  | 10.90797979 | 4.4952174  | 3.98325433 |
| C | -1.76826631 | 10.92092149 | 4.42843095 | 4.13394961 |
| C | 0.34584843  | 12.15179096 | 4.66149733 | 3.98363425 |
| C | 2.54750889  | 10.92538974 | 4.47738022 | 3.97843181 |
| C | -2.51334431 | 12.1244114  | 4.52655047 | 3.84932298 |
| C | -0.38545246 | 13.33641554 | 4.79704234 | 4.14028062 |
| C | 1.81956902  | 12.16390565 | 4.63395536 | 3.9803185  |
| C | 3.94300183  | 10.96160573 | 4.38703577 | 4.13348474 |
| C | -1.80364142 | 13.35539033 | 4.72307896 | 3.85438982 |
| C | 2.53199579  | 13.36714193 | 4.70356863 | 4.13878668 |
| C | 4.6678933   | 12.18117518 | 4.43986972 | 3.85121438 |
| C | 3.9478069   | 13.41108945 | 4.59927412 | 3.85194331 |
| C | 6.65753093  | 13.34681561 | 4.3661181  | 3.85319502 |
| C | -4.58512842 | -8.5314128  | 4.33371146 | 3.85730823 |
| C | 6.50323911  | -8.62595534 | 4.58665301 | 3.85993738 |
| C | -4.51905045 | 13.26453602 | 4.51125861 | 3.85310913 |
| C | 5.93095677  | 14.59076691 | 4.50541808 | 3.8534672  |
| C | -3.79926753 | 14.50731108 | 4.69010467 | 3.85892511 |
| C | -3.86264877 | -9.77429553 | 4.19740994 | 3.8542244  |
| C | 5.77234009  | -9.86539139 | 4.45241904 | 3.85208495 |
| C | 8.11628455  | 13.36565136 | 4.24460289 | 4.01196943 |
| C | 8.80178476  | 14.60931893 | 4.27838851 | 4.00734344 |
| C | 8.84180286  | 12.1675988  | 4.09216701 | 4.09399996 |
| C | 10.2163706  | 14.6119841  | 4.14926971 | 4.00790739 |
| C | 10.24282189 | 12.16050548 | 3.96908811 | 3.98297739 |
| C | 10.90900358 | 13.40018561 | 3.99531887 | 4.08817929 |
| C | -6.04375731 | -8.55409603 | 4.41518858 | 4.00985644 |
| C | -6.76185519 | -7.34786865 | 4.45547061 | 4.09410608 |
| C | -6.73170422 | -9.79836495 | 4.41911954 | 4.00356037 |
| C | -8.16835514 | -7.32296769 | 4.47424194 | 3.99580652 |
| C | -8.14836426 | -9.79046525 | 4.50489095 | 4.01210738 |
| C | -8.835937   | -8.55897162 | 4.50745312 | 4.09484293 |



|   |              |             |            |            |
|---|--------------|-------------|------------|------------|
| C | -5.98161746  | 13.28070178 | 4.4086605  | 4.00782581 |
| C | -6.70314725  | 12.08970786 | 4.2003953  | 4.09409507 |
| C | -6.67736598  | 14.51681562 | 4.50891324 | 4.00939167 |
| C | -8.10779236  | 12.07811083 | 4.09628421 | 3.9832134  |
| C | -8.0949674   | 14.52043312 | 4.39185283 | 4.00823537 |
| C | -8.78293429  | 13.30936898 | 4.19132353 | 4.09431821 |
| C | 7.96076068   | -8.64907661 | 4.64636341 | 4.01131257 |
| C | 8.68141463   | -7.4389249  | 4.63063741 | 4.09689523 |
| C | 8.64455237   | -9.89388111 | 4.6615822  | 4.00503409 |
| C | 10.08610921  | -7.41429977 | 4.64018374 | 3.99385741 |
| C | 10.06472457  | -9.8800255  | 4.71750481 | 4.00720987 |
| C | 10.75732635  | -8.65155162 | 4.70115587 | 4.09329836 |
| C | 6.20771926   | 2.38809509  | 4.0913485  | 3.89288989 |
| C | 6.81750278   | 0.97148136  | 4.04393482 | 4.22016257 |
| C | 6.66716782   | 3.15289959  | 2.82747223 | 4.21595776 |
| C | 6.7383917    | 3.1082589   | 5.35390384 | 4.21651849 |
| C | -4.04741197  | 2.50294058  | 4.17219063 | 3.89227527 |
| C | -4.69616229  | 1.1051815   | 4.17829775 | 4.22068804 |
| C | -4.4961816   | 3.25956896  | 5.44515147 | 4.21788814 |
| C | -4.52837123  | 3.25598707  | 2.90940595 | 4.21687648 |
| C | -8.86342513  | 10.79847046 | 3.67734696 | 3.89204135 |
| C | -8.88752429  | 10.83400302 | 2.15380922 | 4.2185204  |
| C | -8.1386752   | 9.50329605  | 4.09140463 | 4.22942076 |
| C | -10.33123961 | 10.76226869 | 4.14840857 | 4.22913534 |
| C | 11.06973241  | 10.86514776 | 3.81283547 | 3.89119075 |
| C | 10.19201837  | 9.60216501  | 3.91728894 | 4.22168939 |
| C | 11.75399843  | 10.86775625 | 2.42862847 | 4.21910842 |
| C | 12.1489068   | 10.82290872 | 4.92046954 | 4.22681034 |
| C | 10.88781265  | -6.09837725 | 4.54381038 | 3.89260407 |
| C | 11.72017506  | -6.1227948  | 3.24013309 | 4.21610616 |
| C | 9.97058807   | -4.85795969 | 4.50657742 | 4.21909748 |
| C | 11.81974135  | -5.97584192 | 5.77038265 | 4.2158231  |
| C | -8.90216705  | -5.96225807 | 4.42494853 | 3.89189914 |

|   |              |              |             |            |
|---|--------------|--------------|-------------|------------|
| C | -8.49614311  | -5.12212438  | 5.65839749  | 4.21594678 |
| C | -8.48921754  | -5.23024506  | 3.12537757  | 4.21628489 |
| C | -10.43810855 | -6.10493032  | 4.42086365  | 4.22050643 |
| C | 3.25611228   | -1.09688308  | -0.15668262 | 3.98427029 |
| C | 2.54369338   | 0.11458662   | -0.16096681 | 4.09127544 |
| C | 1.13522435   | 0.1457036    | -0.16007167 | 4.01090698 |
| C | 0.39630434   | -1.06624985  | -0.15683665 | 4.00758746 |
| C | 1.10944889   | -2.29338581  | -0.15043697 | 4.00831876 |
| C | 2.51391959   | -2.29230992  | -0.15017986 | 4.08880451 |
| C | 0.41888254   | 1.420055     | -0.16764943 | 3.85634887 |
| C | -1.05221418  | -1.05579125  | -0.15799012 | 4.00318737 |
| C | -1.76673925  | 0.17160463   | -0.14860227 | 4.00719141 |
| C | -3.1750243   | 0.16477082   | -0.1260877  | 4.09661137 |
| C | -3.91194949  | -1.03244655  | -0.12817067 | 3.99370591 |
| C | -3.19208797  | -2.24301443  | -0.15642332 | 4.09361949 |
| C | -1.78629767  | -2.27393065  | -0.16455296 | 4.00754026 |
| C | 0.37580106   | -3.55606557  | -0.15485979 | 3.85491911 |
| C | -1.06951431  | -3.55048175  | -0.17127839 | 3.8565434  |
| C | -1.06634202  | -5.85440591  | -0.1966065  | 3.85274658 |
| C | 0.36764919   | -5.8555442   | -0.1764962  | 3.85273002 |
| C | -1.7503029   | -7.09673573  | -0.23961095 | 4.13434767 |
| C | 1.05956051   | -7.09167977  | -0.21229294 | 4.13505178 |
| C | 0.38072134   | -8.31145067  | -0.2699182  | 3.98246093 |
| C | -1.02802479  | 1.43518857   | -0.16148499 | 3.85384765 |
| C | -0.9965426   | 3.7395056    | -0.20116515 | 3.85114792 |
| C | 0.43795127   | 3.72223148   | -0.19641741 | 3.85364085 |
| C | -1.66656568  | 4.99047092   | -0.23522045 | 4.13528449 |
| C | 1.1435049    | 4.95258628   | -0.20079078 | 4.13571578 |
| C | 0.47826681   | 6.18094472   | -0.23073375 | 3.97954384 |
| C | -1.06392095  | -8.31468516  | -0.27194697 | 3.98238621 |
| C | -1.79584703  | -9.5901154   | -0.32340875 | 3.97813411 |
| C | -3.19176912  | -9.61884382  | -0.22094793 | 4.13394792 |
| C | -1.06779476  | -10.82844966 | -0.47995408 | 3.97987193 |

|   |             |              |             |            |
|---|-------------|--------------|-------------|------------|
| C | 1.12529262  | -9.57593769  | -0.36516245 | 3.98315102 |
| C | -3.92562055 | -10.83270909 | -0.2795354  | 3.85112189 |
| C | -1.78685136 | -12.02678023 | -0.54600993 | 4.13791744 |
| C | 0.40687434  | -10.81952366 | -0.52333312 | 3.98348593 |
| C | 2.52458304  | -9.58652745  | -0.32432734 | 4.13413238 |
| C | -3.20364472 | -12.05978821 | -0.44792337 | 3.85231089 |
| C | 1.13860296  | -12.00223487 | -0.67712561 | 4.13982305 |
| C | 3.27123024  | -10.78689284 | -0.44825366 | 3.84945202 |
| C | 2.55948324  | -12.01813867 | -0.63755238 | 3.85423351 |
| C | -0.96624821 | 6.20088      | -0.26489218 | 3.9783959  |
| C | -1.68077157 | 7.48715666   | -0.3138249  | 3.98038524 |
| C | -3.06654214 | 7.54260586   | -0.4907317  | 4.14024542 |
| C | -0.9463683  | 8.72182803   | -0.17446481 | 3.98182271 |
| C | 1.23220365  | 7.44331525   | -0.19784107 | 3.98106218 |
| C | -3.76983218 | 8.77656303   | -0.48913389 | 3.85559567 |
| C | -1.63332974 | 9.93986785   | -0.18053915 | 4.13620925 |
| C | 0.51958132  | 8.69373124   | -0.08993044 | 3.98146213 |
| C | 2.63029549  | 7.4538307    | -0.25578344 | 4.13390603 |
| C | -3.04260043 | 10.00248895  | -0.32375026 | 3.85317892 |
| C | 1.24182009  | 9.88144002   | 0.03334529  | 4.1354504  |
| C | 3.3702191   | 8.66392987   | -0.18870337 | 3.85398267 |
| C | 2.65658045  | 9.89680596   | -0.02111881 | 3.85245434 |
| C | 5.36007134  | 9.82619593   | -0.23046721 | 3.85724093 |
| C | -5.92212083 | -11.99510299 | -0.22675052 | 3.85206074 |
| C | 5.28230693  | -11.91979771 | -0.49073085 | 3.8529725  |
| C | -5.73659548 | 9.96965906   | -0.58025395 | 3.85939882 |
| C | 4.63455336  | 11.06313944  | -0.07569655 | 3.85512721 |
| C | -5.00500812 | 11.20740603  | -0.43437875 | 3.8516836  |
| C | -5.18944724 | -13.23576752 | -0.37965542 | 3.85505501 |
| C | 4.5616537   | -13.16263602 | -0.66602183 | 3.85927477 |
| C | 6.81929373  | 9.86949      | -0.32626376 | 4.00875394 |
| C | 7.4938179   | 11.12344962  | -0.30810995 | 4.0037868  |
| C | 7.55773881  | 8.67754903   | -0.41767952 | 4.09496801 |

|   |              |              |             |            |
|---|--------------|--------------|-------------|------------|
| C | 8.9085164    | 11.1366542   | -0.4097404  | 4.01008996 |
| C | 8.96332637   | 8.67709134   | -0.49314691 | 3.993265   |
| C | 9.6162598    | 9.92137137   | -0.49408024 | 4.09906815 |
| C | -7.38561991  | -12.02837678 | -0.11861989 | 4.01182087 |
| C | -8.146786    | -10.84969282 | 0.02956005  | 4.09086519 |
| C | -8.04661302  | -13.28908198 | -0.15636315 | 4.00714115 |
| C | -9.55464172  | -10.87606066 | 0.13622201  | 3.98252978 |
| C | -9.45815396  | -13.31917679 | -0.03465339 | 4.00731368 |
| C | -10.18489703 | -12.12815484 | 0.108382    | 4.09254948 |
| C | -7.19442524  | 9.99472486   | -0.65192606 | 4.01139662 |
| C | -7.91801307  | 8.78869129   | -0.63784836 | 4.09458722 |
| C | -7.87977536  | 11.24032204  | -0.66311802 | 4.00512997 |
| C | -9.32604344  | 8.76425244   | -0.63889476 | 3.9938017  |
| C | -9.29958558  | 11.22662682  | -0.71443044 | 4.00739158 |
| C | -9.99632508  | 9.99810972   | -0.69714876 | 4.09491504 |
| C | 6.7470197    | -11.9349794  | -0.4077598  | 4.00786747 |
| C | 7.47058182   | -10.74402875 | -0.20503676 | 4.09404424 |
| C | 7.44337835   | -13.17136502 | -0.50871158 | 4.00924494 |
| C | 8.87561263   | -10.73324619 | -0.10338156 | 3.98332846 |
| C | 8.86152721   | -13.1770824  | -0.38818593 | 4.0083879  |
| C | 9.54976763   | -11.96562931 | -0.19193511 | 4.09425806 |
| C | 4.79843471   | -1.16814914  | -0.16640108 | 3.89227061 |
| C | 5.27751816   | -1.91720323  | 1.09950293  | 4.21695639 |
| C | 5.25087448   | -1.92761942  | -1.4362646  | 4.21775163 |
| C | 5.44532389   | 0.23039073   | -0.17407812 | 4.22070734 |
| C | -5.45830588  | -1.06115536  | -0.08863052 | 3.89288058 |
| C | -5.99127252  | -1.78243684  | -1.34950432 | 4.21641579 |
| C | -5.91492451  | -1.82477692  | 1.17710134  | 4.21596756 |
| C | -6.06816449  | 0.3554524    | -0.04099483 | 4.22014614 |
| C | -10.05751522 | 7.41033438   | -0.51806223 | 3.89256435 |
| C | -9.67067233  | 6.51048326   | -1.71391253 | 4.21602098 |
| C | -9.62460383  | 6.74286081   | 0.80949466  | 4.21635735 |
| C | -11.59093649 | 7.56874937   | -0.50402058 | 4.21889087 |

|   |              |              |             |            |
|---|--------------|--------------|-------------|------------|
| C | 9.72704632   | 7.33455991   | -0.54483891 | 3.89267422 |
| C | 9.48092203   | 6.58101276   | 0.78370098  | 4.21546778 |
| C | 9.20883767   | 6.48954468   | -1.73240109 | 4.2168885  |
| C | 11.24721639  | 7.53195354   | -0.71727874 | 4.21966876 |
| C | 9.62989549   | -9.45438752  | 0.32138957  | 3.89191564 |
| C | 8.90903102   | -8.15777668  | -0.09599586 | 4.22939688 |
| C | 9.64064768   | -9.49776731  | 1.84508318  | 4.21873893 |
| C | 11.10121766  | -9.41262752  | -0.13745308 | 4.22904624 |
| C | -10.38972132 | -9.59653081  | 0.37005958  | 3.8915819  |
| C | -10.10379462 | -9.10492421  | 1.79455074  | 4.22101965 |
| C | -10.01304305 | -8.48986864  | -0.62359003 | 4.2217117  |
| C | -11.90711099 | -9.85304004  | 0.23413537  | 4.21962389 |
| N | -0.37841887  | -1.22307142  | 4.1793971   | 5.27540086 |
| N | -0.31652288  | 6.02535763   | 4.22389066  | 5.27481324 |
| N | 2.45769799   | -1.25241218  | 4.18476904  | 5.2783554  |
| N | 2.52056639   | 6.01863578   | 4.24763988  | 5.2778633  |
| N | 6.02478307   | 12.17305696  | 4.3326886   | 5.27565608 |
| N | 4.60107709   | 14.60669625  | 4.62273696  | 5.28174082 |
| N | -3.87213113  | 12.10123611  | 4.42969006  | 5.27081029 |
| N | -2.47059068  | 14.53877068  | 4.79956413  | 5.28217582 |
| N | -3.95836085  | -7.35437864  | 4.37346573  | 5.27995564 |
| N | -2.53419213  | -9.79455441  | 4.10317811  | 5.27426195 |
| N | 4.44291586   | -9.8693672   | 4.35375423  | 5.26961087 |
| N | 5.88935517   | -7.44299534  | 4.63151833  | 5.28018515 |
| N | -1.76720546  | -4.68711311  | -0.19007709 | 5.27776131 |
| N | -1.71069414  | 2.58093521   | -0.17649147 | 5.27843352 |
| N | 1.07073617   | -4.69247259  | -0.15251242 | 5.27472929 |
| N | 1.12635478   | 2.54968152   | -0.1800587  | 5.27531341 |
| N | 4.72929516   | 8.65077373   | -0.28258237 | 5.27959379 |
| N | 3.30798884   | 11.08659195  | 0.03841658  | 5.27428172 |
| N | -5.12361703  | 8.78610625   | -0.61680388 | 5.28029981 |
| N | -3.67731869  | 11.20744401  | -0.30768465 | 5.26990515 |
| N | -5.28509966  | -10.82353641 | -0.17787169 | 5.27553938 |

|   |             |              |             |            |
|---|-------------|--------------|-------------|------------|
| N | -3.86020778 | -13.25121939 | -0.49392009 | 5.27881112 |
| N | 3.23007462  | -13.19742709 | -0.74264384 | 5.28211881 |
| N | 4.63226553  | -10.7599792  | -0.38347221 | 5.27058974 |
